# Supplementary material for: Engineering the proton conductivity of metal–organic hybrid materials by varying the coordination mode of the ligand
Source: Royal Society of Chemistry journal article supplement (doi:10.1039/c6ce00299d), 2016-01-01
Supplement: c6ce00299d1.pdf [file c6ce00299d1.pdf]

---

## Supplementary Information

### Engineering the Proton Conductivity of Metal-organic Hybrid Materials by Varying Coordination Mode of the Ligand

Bailing Liu, Hong-Ying Zang\*, Hua-Qiao Tan, Yong-Hui Wang, Yang-Guang Li\*

#### Contents:

|                                                                                                                                      |    |
|--------------------------------------------------------------------------------------------------------------------------------------|----|
| Table S1. Selected bond lengths(Å) and angles(°) for 1.....                                                                          | 1  |
| Table S2. Selected bond lengths(Å) and angles(°) for 2.....                                                                          | 2  |
| Fig.S1 (a) The packing diagram of compound 1; (b) The hydrogen bond of intermolecules and possible proton hopping pathway.....       | 3  |
| Fig.S2 & S3 FT-IR spectroscopy of compound 1 and 2.....                                                                              | 3  |
| Fig.S4 & S5 The solid state UV-vis spectra of compound 1 and 2.....                                                                  | 4  |
| Fig.S6 & S7 Thermogravimetric analysis curve for compound 1 and 2.....                                                               | 5  |
| Fig. S8 XPS spectra of Cu+ 2p level of compound 1.....                                                                               | 6  |
| Fig.S9 & S10 PXRD patterns of compound 1.....                                                                                        | 7  |
| Fig.S11 & S12 Water vapor adsorption and desorption isotherm for Compound 1 and 2 at STP.....                                        | 8  |
| Fig.S13 & S14 Nyquist plot of compound 1 and 2 at 298K showing decrease in proton conductivity with respect to room temperature..... | 9  |
| Fig.S15 & S16. Impedance plot of 1 and 2 from 45 to 85 °C at relative humidity 65%.....                                              | 10 |

---

**Selected bond lengths and angles for compounds****Table S1.** Selected bond lengths (Å) and angles (deg) of **1**.

|                 |            |                  |          |
|-----------------|------------|------------------|----------|
| Cu(1)-N(3)      | 1.863(3)   | C(17)-N(3)-Cu(1) | 131.3(3) |
| N(7)-Cu(2)-N(5) | 175.50(15) | C(17)-N(3)-Cu(1) | 131.3(3) |

Symmetry transformations used to generate equivalent atoms: #1 -x, y, -z+1/2  
#2 -x, y, -z+3/2

**Table S2.** Selected bond lengths (Å) and angles (deg) of **2**.

|                         |            |                         |            |
|-------------------------|------------|-------------------------|------------|
| Mo(1)-O(3)              | 2.240(3)   | Mo(1)-O(9)              | 1.708(3)   |
| Mo(1)-O(15)             | 1.957(3)   | Mo(1)-O(16)             | 1.945(3)   |
| Mo(1)-O(12)             | 1.688(3)   | Mo(1)-O(13)             | 2.315(3)   |
| Mo(2)-O(8)              | 1.687(4)   | Mo(2)-O(14)             | 1.958(3)   |
| Mo(2)-O(2)              | 2.207(3)   | Mo(2)-O(15)             | 2.258(3)   |
| Mo(2)-O(4)              | 1.712(4)   | O(12)-Mo(1)-O(9)        | 102.83(18) |
| O(5)-Mo(4)#1            | 2.272(3)   | O(12)-Mo(1)-O(16)       | 104.57(16) |
| O(9)-Mo(1)-O(16)        | 98.59(15)  | O(10)-Mo(3)-<br>O(16)#1 | 105.14(16) |
| O(8)-Mo(2)-O(4)         | 102.56(19) | O(11)-Mo(4)-O(6)        | 102.76(17) |
| C(20)-O(1)-Mo(3)        | 133.0(3)   | C(10)-O(2)-Mo(2)        | 133.6(3)   |
| O(11)-Mo(4)-<br>O(14)#2 | 103.57(16) | C(10)-O(3)-Mo(1)        | 130.7(3)   |
| Mo(4)-O(13)-Mo(2)       | 144.99(18) | Mo(4)#1-O(14)-<br>Mo(2) | 142.48(18) |

Symmetry transformations used to generate equivalent atoms: #1 x-1, y, z, #2 x+1, y,  
z, #3 -x+1, -y, -z

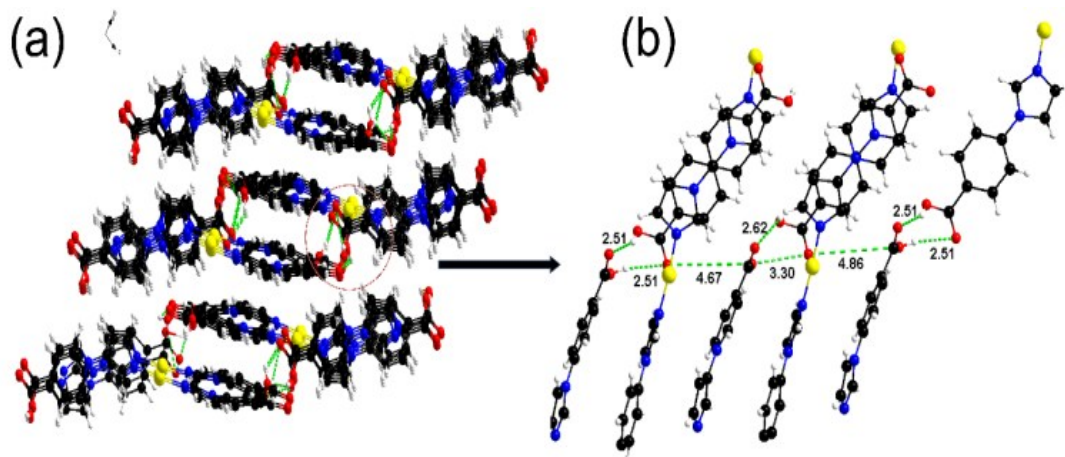

**Fig.S1** (a) The packing diagram of compound 1; (b) The hydrogen bond of intermolecules and possible proton hopping pathway.

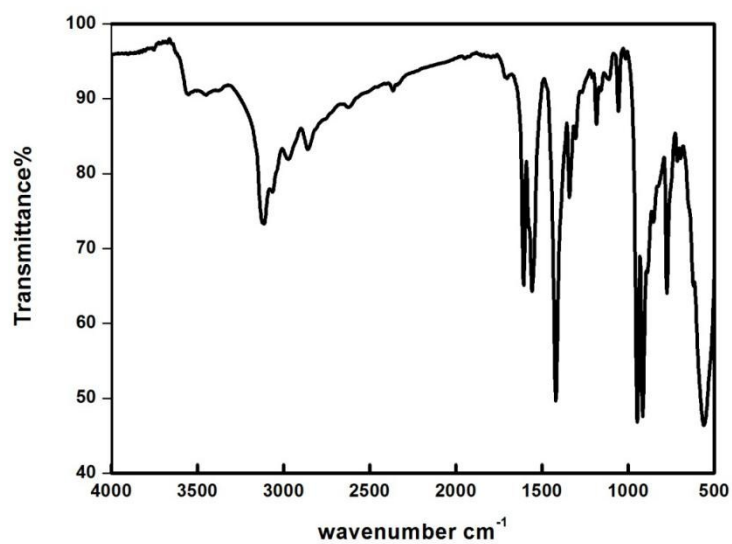

**Fig.S2** FT-IR spectroscopy of compound1.

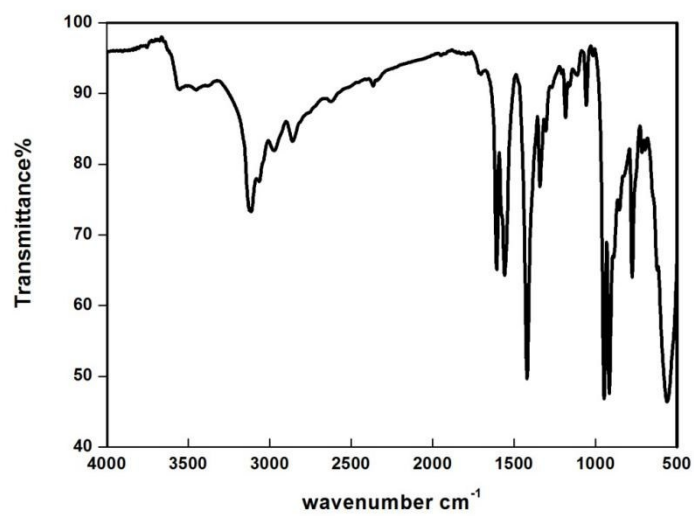

**Fig.S3** FT-IR spectroscopy of compound**2**.

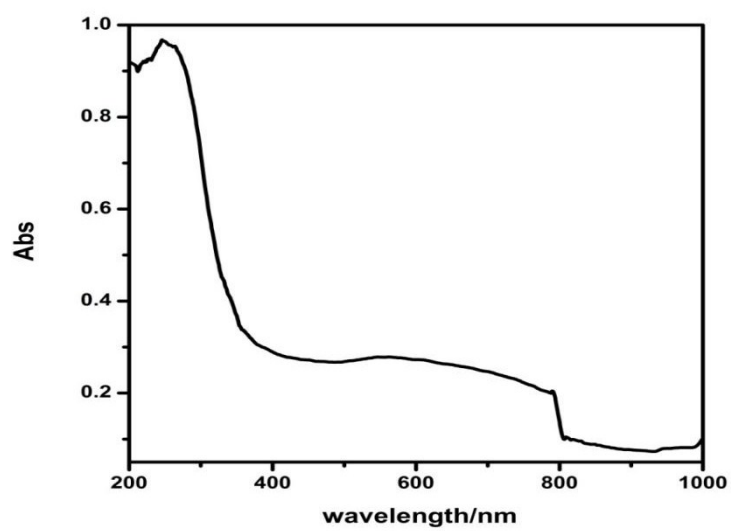

**Fig.S4** The solid state UV-vis spectra of compound **1**.

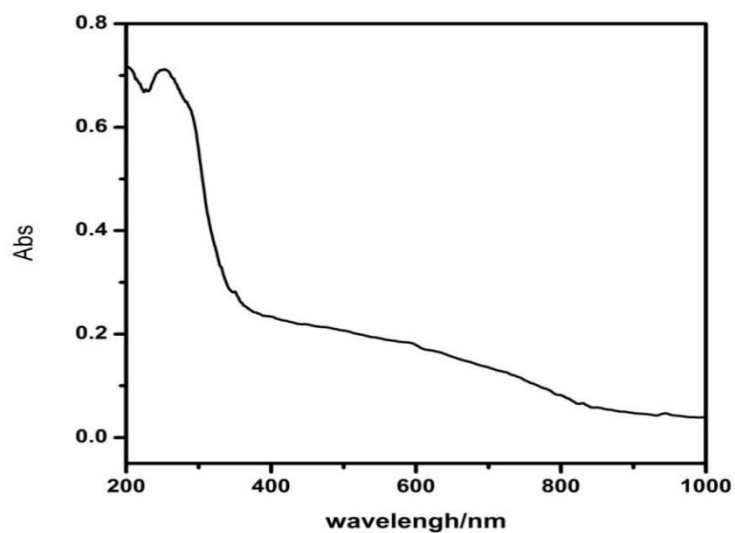

**Fig.S5** The solid state UV-vis spectra of compound 2.

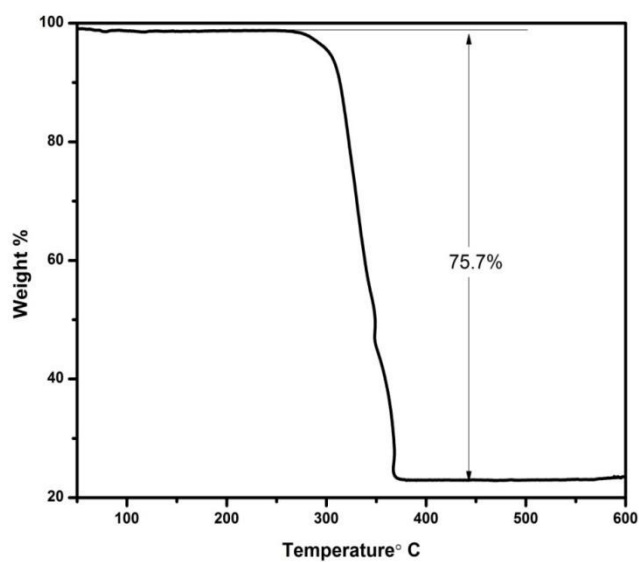

**Fig.S6** Thermogravimetric analysis curve for compound 1

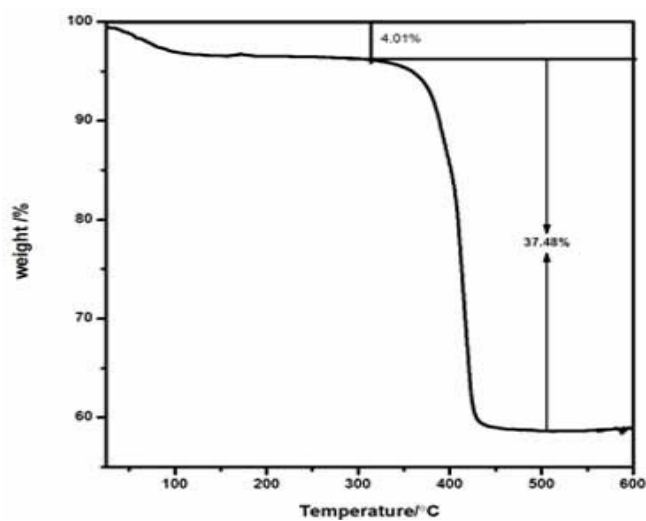

**Fig.S7** Thermogravimetric analysis curve for compound 2.

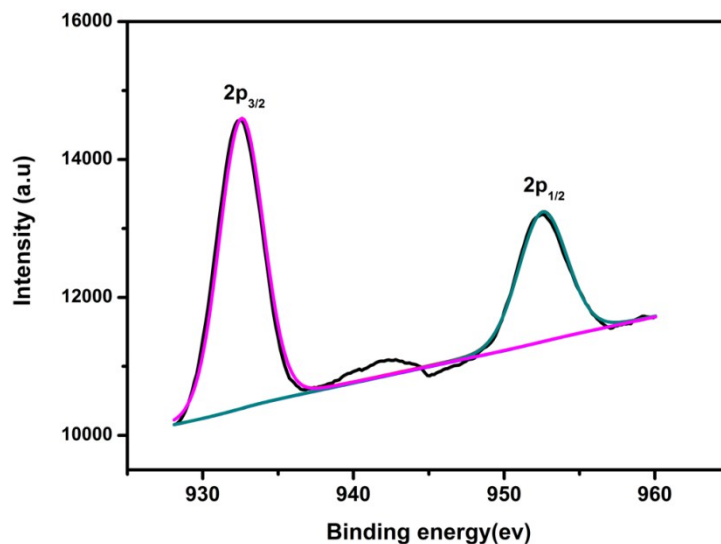

**Fig.S8** XPS spectra of Cu<sup>+</sup> 2p level of compound **1**, showing two partially overlapped peaks. The curve fitting provides peak positions at 932.57eV, 952.57eV, attributed to 2p<sub>3/2</sub>, 2p<sub>1/2</sub>, respectively.

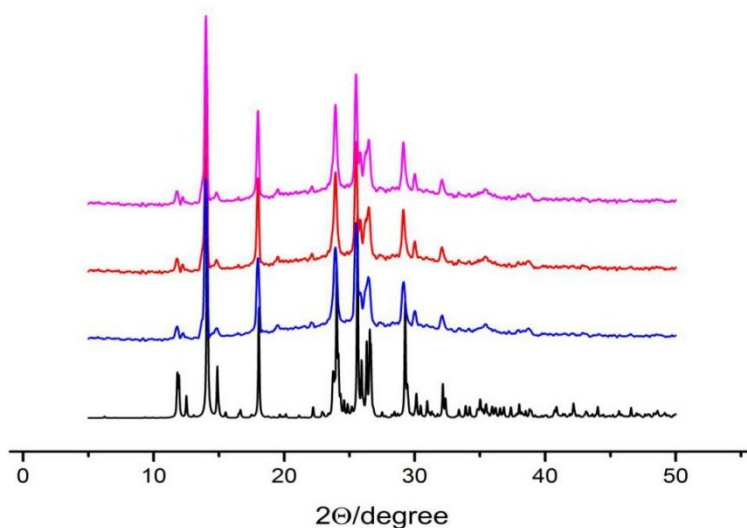

**Fig.S9** PXRD patterns of compound **1**: the simulated pattern (black), as-synthesized sample (blue), after boiled in boiling water (red), after proton conductivity measurement under 97% RH at 25°C (purple curve) are given for comparison.

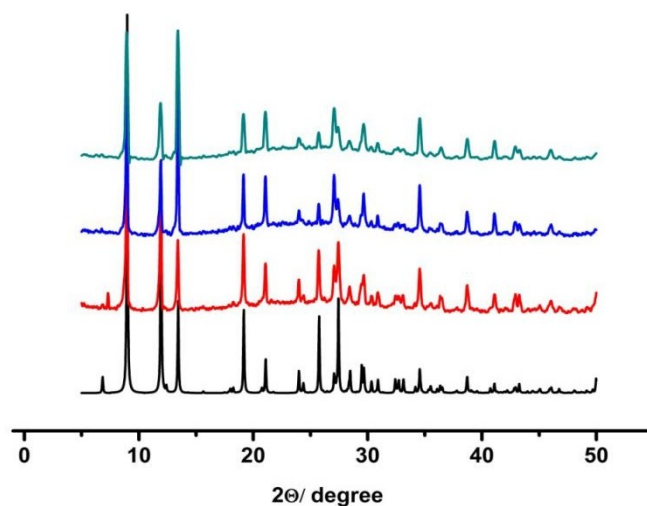

**Fig.S10** PXR D patterns of compound **2**: the simulated pattern (black), as-synthesized sample (red), after boiled in boiling water (blue), after proton conductivity measurement under RH 97% at 25 °C (glaucons) are given for comparison.

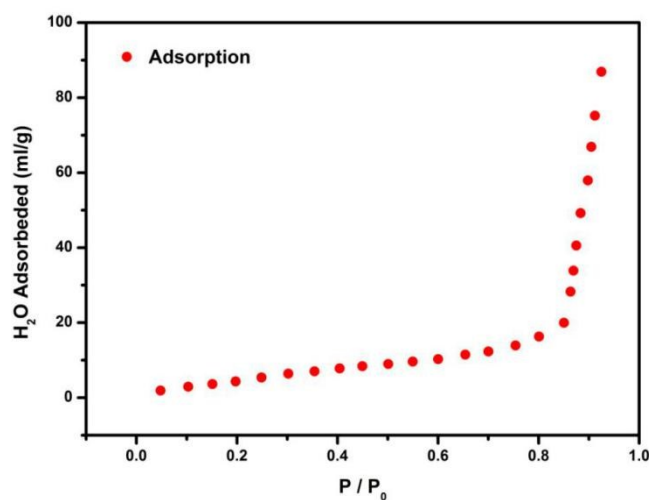

**Fig.S11** Water vapor adsorption isotherm for compound **1** at STP.

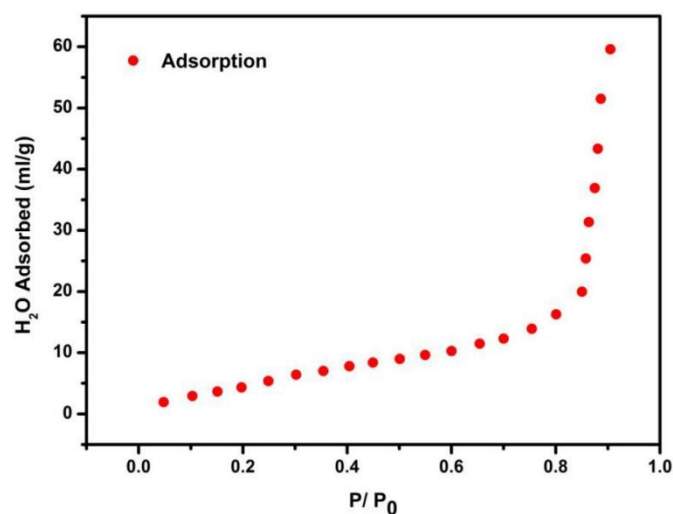

**Fig. S12** Water vapor adsorption isotherm for compound **2** at STP.

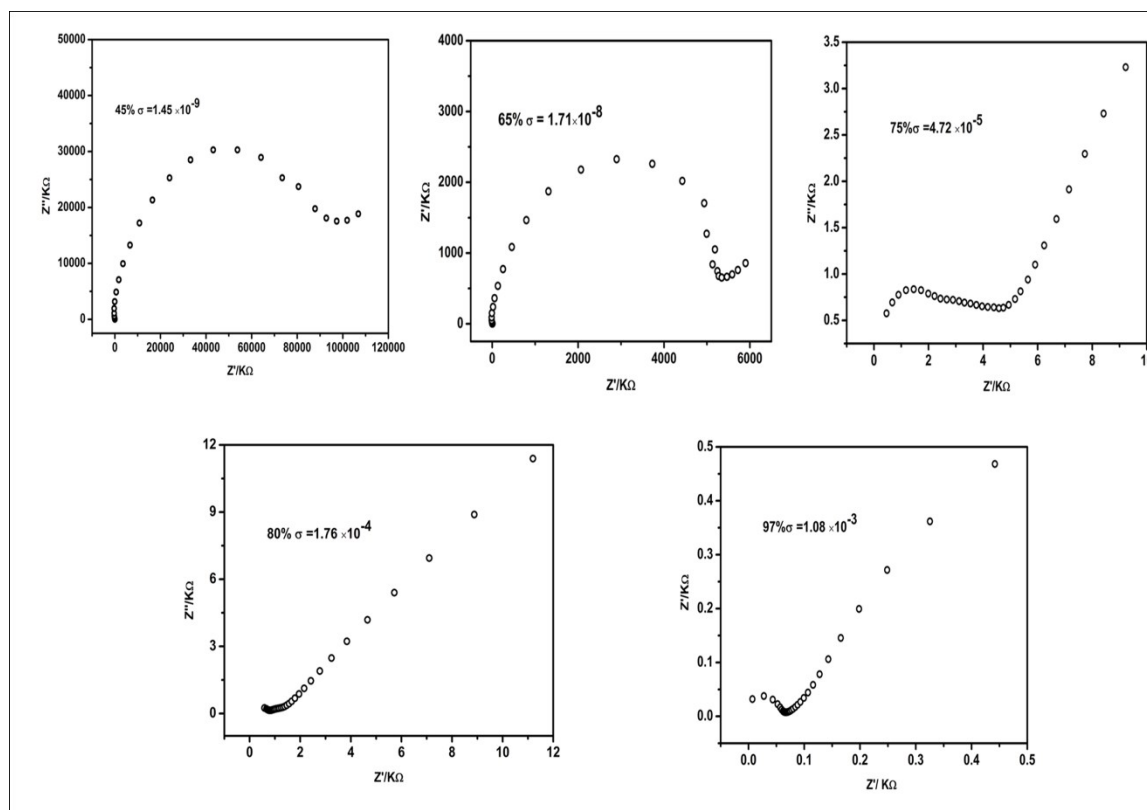

**Fig.S13** Nyquist plot of compound **1** at 298K showing decrease in proton conductivity with respect to room temperature. Relative Humidity 45%,  $\sigma=1.45 \times 10^{-9}$  S cm<sup>-1</sup>; 65%,  $\sigma=1.71 \times 10^{-8}$  S cm<sup>-1</sup>; Relative Humidity 75%,  $\sigma=4.72 \times 10^{-5}$  S cm<sup>-1</sup>; Relative Humidity 80%,  $\sigma=1.76 \times 10^{-4}$  S cm<sup>-1</sup>; Relative Humidity 97%,  $\sigma=1.08 \times 10^{-3}$  S cm<sup>-1</sup>.



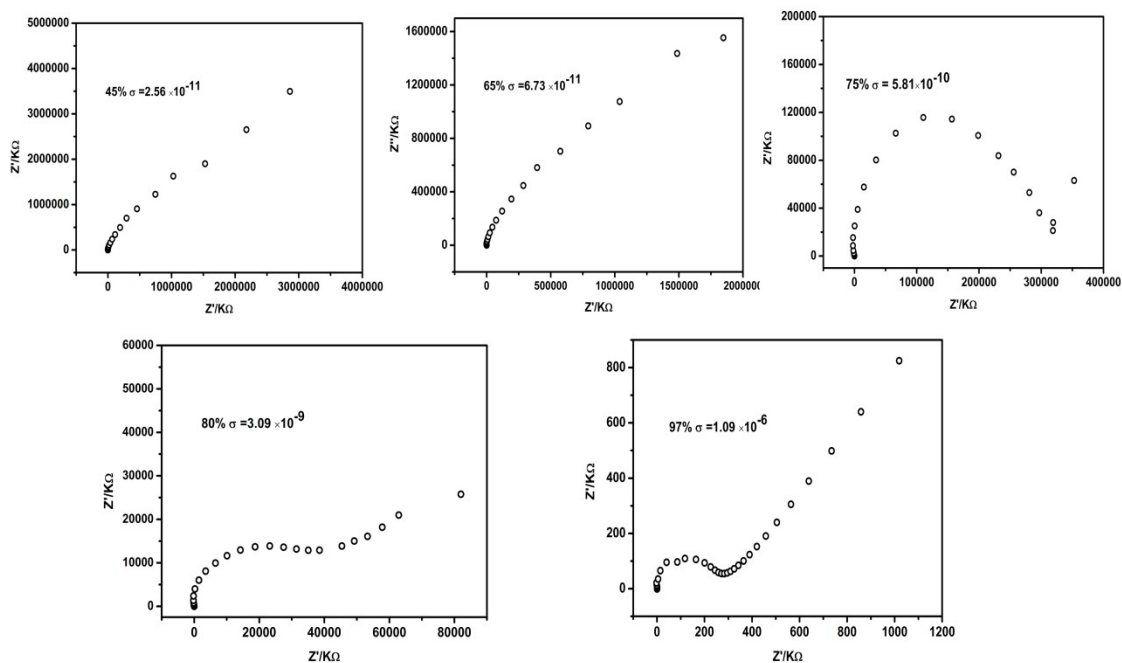

**Fig.S14** Nyquist plot of compound **2** at 298K showing decrease in proton conductivity with respect to room temperature. Relative Humidity 45%,  $\sigma=2.56 \times 10^{-11}$  S  $\text{cm}^{-1}$ ; Relative Humidity 65%,  $\sigma=6.73 \times 10^{-11}$  S  $\text{cm}^{-1}$ ; Relative Humidity 75%,  $\sigma=5.81 \times 10^{-10}$  S  $\text{cm}^{-1}$ ; Relative Humidity 80%,  $\sigma=3.09 \times 10^{-9}$  S  $\text{cm}^{-1}$ ; Relative Humidity 97%,  $\sigma=1.09 \times 10^{-6}$  S  $\text{cm}^{-1}$ ;

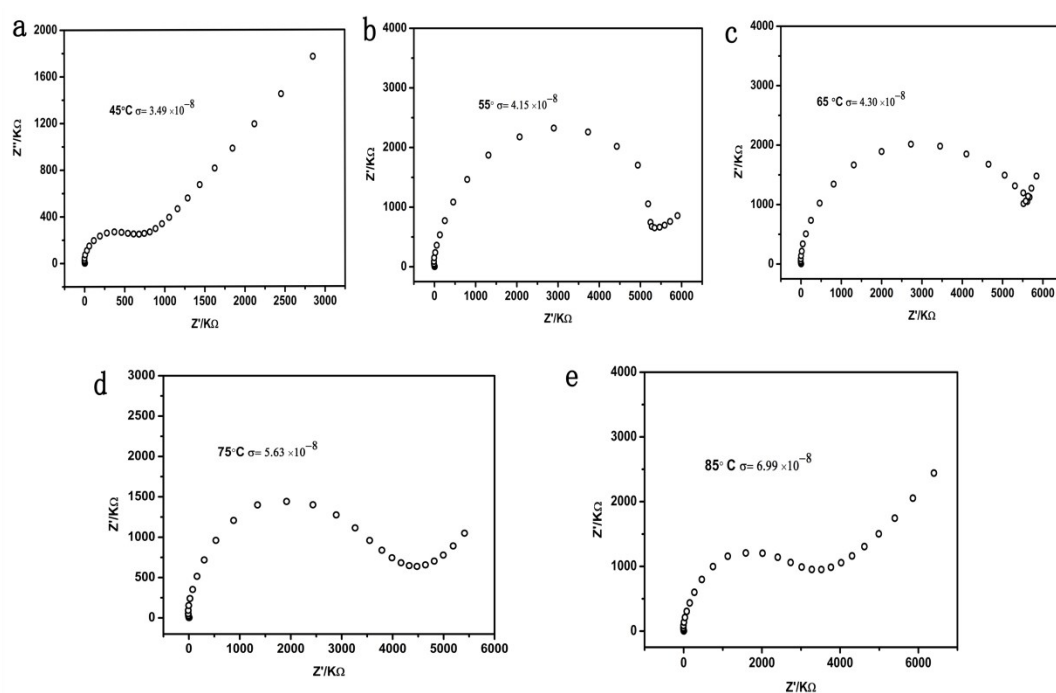

**Fig.S15** Impedance plots of compound **1** from 45 to 85 °C at relative humidity 65%.

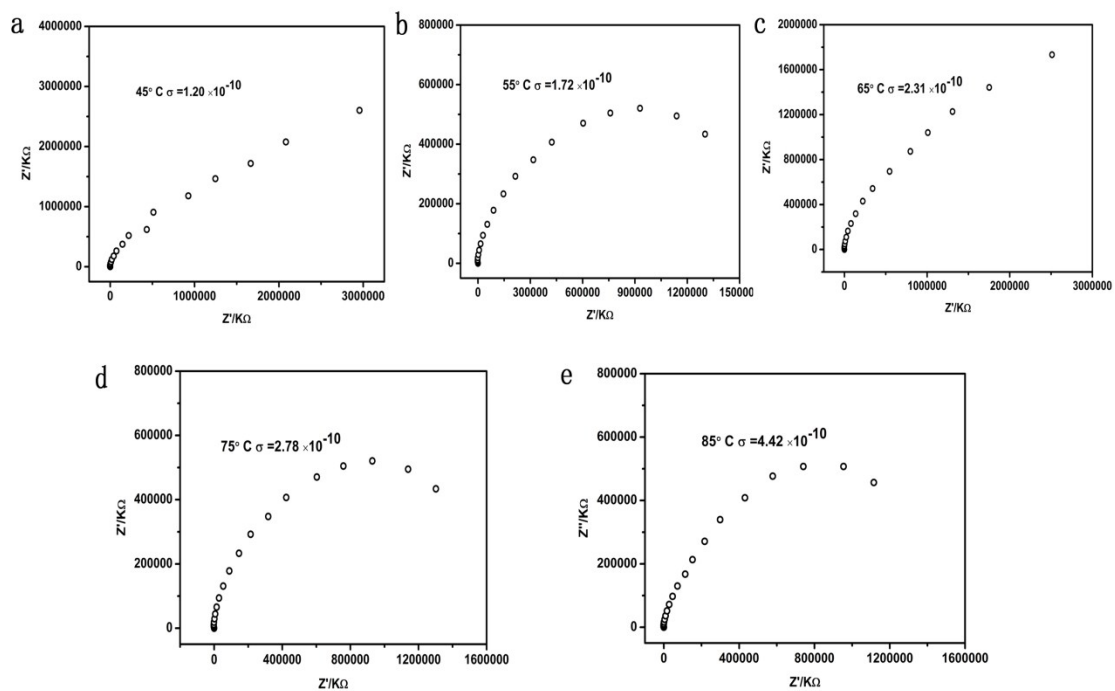

**Fig.S16** Impedance plots of compound **2** from 45 to 85 °C under relative humidity 65%.
